# Supplementary material for: The Effects of Insulin Therapy on Mothers’ Blood Pressure and Weight in Women with Gestational Diabetes Mellitus
Source: Research Square preprint supplement (doi:10.21203/rs.3.rs-330032/v1), 2021-03-18
Supplement: Supplementary file 1 [file 554b3bdb445b9ceac857e60b.xlsx]

## Sheet: Table 1
Table 1 Characteristics of subjects between lifestyle intervention group and insulin therapy group in all GDM women
	All women				Women matched pregnant weeks at performing OGTT
	Lifestyle intervention group	Insulin therapy group	P		Lifestyle intervention group	Insulin therapy group	P
n	616	92			78	78
Age (years)	29.5 ± 5.0	30.7 ± 4.1	0.125		30.4 ± 5.1	30.6 ± 3.8	0.82
Pre-pregnancy BMI (kg/m2)	23.9 ± 4.0	24.8 ± 4.3	0.152		24.0 ± 3.6	24.9 ± 4.4	0.312
Family history of DM	9 (6.3)	8 (25.0)	0.001		1 (3.8)	5 (19.2)	0.191
At the first visit
SBP (mmHg)	118 ± 11	119 ± 12	0.627		118 ± 10	119 ± 12	0.837
DBP(mmHg)	71 ± 8	70 ± 7	0.63		71 ± 7	70 ± 7	0.386
Creatin (μmol/L)	39.65 ± 6.37	40.71 ± 5.82	0.668		47.59 ± 14.59	40.71 ± 5.82	0.279
UA (mmol/L)	225.65 ± 43.08	236.14 ± 90.23	0.66		233.60 ± 32.88	236.14 ± 90.23	0.954
eGFR (ml/min/1.73m2)	180.6 ± 31.7	171.2 ± 24.8	0.443		150.9 ± 44.1	171.2 ± 24.8	0.331
ALT (units/L)	19.0 (13.0 - 34.0)	23.0 (15.0 - 80.0)	0.257		15.0 (11.5 - 45.5)	23.0 (15.0 - 80.0)	0.221
AST (units/L)	18.5 (15.0 - 22.5)	17.0 (16.0- 20.0)	0.727		15.0 (14.0 - 17.5)	17.0 (16.0 - 20.0)	0.139
At performing OGTT
OGTT time (week)	25.8 ± 2.9	24.3 ± 4.8	0.042		25.8 ± 2.8	25.8 ± 2.8	1
BMI (kg/m2)	26.5 ± 3.7	27.6 ± 4.4	0.213		26.5 ± 3.0	27.6 ± 4.4	0.302
SBP (mmHg)	120 ± 12	124 ± 11	0.083		123 ± 10	129 ± 12	0.151
DBP (mmHg)	69 ± 9	70 ± 8	0.525		71 ± 6	72 ± 9	0.472
FBG (mmol/L)	4.70 ± 0.73	5.61 ± 1.48	< 0.001		4.66 ± 0.81	5.55 ± 1.56	0.003
1 h BG (mmol/L)	9.64 ± 1.63	11.32 ± 2.20	< 0.001		10.52 ± 1.35	11.42 ± 2.24	0.037
2 h BG (mmol/L)	8.29 ± 1.55	9.61 ± 2.49	0.002		9.10 ± 0.87	9.73 ± 2.48	0.142
HbA1c (%)	5.2 ± 0.4	5.6 ± 0.6	< 0.001		5.3 ± 0.4	5.5 ± 0.5	0.084
HbA1c (mmol/mol)	33	38			34	37
Area under BG curve	16.14 ± 1.93	18.86 ± 3.80	< 0.001		17.50 ± 1.44	19.01 ± 3.88	0.034
HOMA - IR*	2.54 (1.66 - 3.45)	2.30 (1.66 - 3.63)	0.716		1.66 (1.30 - 2.91)	3.00 (1.53 - 3.63)	0.036
HOMA - β*	295.85 (162.47 - 663.78)	94.90 (52.05 - 259.19)	< 0.001		229.45 (88.94 - 743.19)	95.23 (52.05 - 259.19)	0.003
CH (mmol/L)	5.50 ± 1.26	5.47 ± 1.30	0.896		5.08 ± 1.41	5.53 ± 1.28	0.208
TG (mmol/L)	3.18 ± 1.76	3.05 ± 1.82	0.667		3.29 ± 2.69	3.18 ± 1.84	0.846
HDL (mmol/L)	1.73 ± 0.45	1.67 ± 0.42	0.521		1.65 ± 0.35	1.69 ± 0.43	0.727
LDL (mmol/L)	2.93 ± 1.04	2.96 ± 1.02	0.897		2.35 ± 1.10	2.98 ± 1.00	0.032
One week before delivery
Delivery time	38.6 ± 1.5	39.1 ± 1.3	0.17		38.5 ± 1.0	39.2 ± 1.3	0.094
intervention time frame (weeks)	12.6 ± 3.1	12.3 ± 1.6	0.628		12.1 ± 2.7	12.3 ± 1.6	0.856
BMI (kg/m2)	28.4 ± 3.5	30.9 ± 4.5	0.02		28.6 ± 3.4	30.5 ± 4.8	0.019
SBP (mmHg)	124 ± 13	131 ± 13	0.005		128 ± 13	135 ± 13	0.045
DBP (mmHg)	74 ± 9	80 ± 8	0.007		75 ± 11	82 ± 8	0.044
Total GWG (kg)			0.068				0.531
Adequate	225 (42.1)	12 (16.7)			15 (23.8)	10 (14.7)
Inadequate	171 (31.3)	24 (33.3)			21 (33.3)	18 (26.5)
Exceesive	150 (27.5)	36 (50.0)			27 (42.9)	40 (58.8)
Rate of weight gain after OGTT (kg week-1)			0.345				0.144
Adequate	84 (28.6)	12 (11.8)			30 (41.7)	9 (16.7)
Inadequate	72 (24.5)	15 (29.4)			24 (33.3)	18 (33.3)
Exceesive	138 (46.9)	60 (58.8)			18 (25.0)	27 (50.0)
Gestational hypertension	72 (11.7)	20 (31.0)	0.001		10 (16.7)	18 (29.3)	0.038
Caesarean section	280 (68.3)	46 (63.9)	0.602		40 (74.1)	40 (69.0)	0.672
Fetal sex (female)	310 (49.1)	22 (37.9)	0.26		22 (42.3)	20 (38.5)	0.777
Preterm	14 (4.7)	2 (6.3)	0.779		2 (5.6)	2 (6.3)	0.932
Newborn weight (g)	3484.5 ± 488.7	3592.1 ± 638.5	0.26		3451.2 ± 509.4	3602.1 ± 605.6	0.328
Macrosomia	62 (14.3)	10 (15.2)	0.796		6 (11.5)	8 (14.3)	1

## Sheet: Table 2
Table 2 Comparing parameters of subjects between women with GH and without
	Women without GH	Women with GH	P
n	588	92
Age	30 ± 5	31 ± 4	0.204
History of family hypertension	35 (6.0)	21 (22.8)	0.017
Pre-pregnancy BMI (kg/m2)	23.5 ± 3.1	25.8 ± 3.9	0.006
At the first visist
SBP(mmHg)	118 ± 10	128 ± 10	< 0.001
DBP(mmHg)	71 ± 7	76 ± 8	0.008
Cr (μmol/L)	39.62 ± 4.95	24.54 ± 10.09	0.178
UA (mmol/L)	230.35 ± 64.01	221.81 ± 33.73	0.685
eGFR (ml/min/1.73m2)	178.01 ± 27.21	167.35 ± 33.01	0.256
ALT (units/L)	10.0 (8.0 - 12.0)	11.0 (8.5 - 14.0)	0.469
AST (units/L)	20.0 (15.5 - 30.5)	21.0 (18.0 - 37.0)	0.314
At performing OGTT
OGTT time (weeks)	26.2 ± 2.7	24.9 ± 3.9	0.08
BMI (kg/m2)	26.1 ± 2.5	29.7 ± 4.6	0.042
SBP(mmHg)	122 ± 11	134 ± 14	< 0.001
DBP(mmHg)	71 ± 6	77 ± 7	0.001
FBG (mmol/L)	4.30 ± 0.63	4.28 ± 0.70	0.917
1 h BG (mmol/L)	10.00 ± 1.60	10.63 ± 1.21	0.085
2 h BG (mmol/L)	8.20 ± 1.62	9.50 ± 1.42	0.001
HbA1c (%)	5.2 ± 0.4	5.3 ± 0.4	0.656
HbA1c (mmol/mol)	33	34
Area under BG curve	16.23 ± 1.94	17.52 ± 1.63	0.006
HOMA-IR*	2.48 (1.44 - 3.29)	1.94 (1.65 - 3.26)	0.644
HOMA - β*	333.90 (175.10 - 775.25)	272.15 (174.84 - 609.44)	0.679
CH (mmol/L)	5.68 ± 1.24	5.69 ± 1.15	0.973
TG (mmol/L)	3.17 ± 1.57	3.58 ± 1.12	0.261
HDL (mmol/L)	1.60 ± 0.23	1.53 ± 0.32	0.399
LDL (mmol/L)	3.07 ± 1.04	2.92 ± 1.09	0.584
Insulin therapy	45 (11.2)	40 (43.5)	< 0.001
One week before delivery
Delivery time (weeks)	39.7 ± 1.5	39.1 ± 1.2	0.377
intervention time frame (weeks)	12.5 ± 3.1	13.2 ± 1.7	0.223
BMI (kg/m2)	27.8 ± 3.0	31.1 ± 3.7	< 0.001
Total GWG (kg)			< 0.001
Adequate	144 (45.0)	16 (22.2)
Inadequate	124 (38.8)	8 (11.1)
Excessive	52 (16.3)	48 (66.7)
Rate of weight gain after OGTT (kg week-1)			0.036
Adequate	68 (28.3)	4 (6.7)
Inadequate	64 (26.7)	8 (13.3)
Excessive	108 (45.0)	48 (80.0)
SBP(mmHg)	122 ± 9	146 ± 6	< 0.001
DBP(mmHg)	72 ± 7	85 ± 8	< 0.001
Caesarean section	100 (70.2)	71 (63.2)	0.46
Newborn weight (g)	3551.1 ± 413.7	3619.1 ± 400.6	0.491
Preterm	20 (4.0)	3 (0.3)	0.241
Female fetal	201 (42.9)	37 (44.0)	0.827
Macrosomia	65 (10.5)	7 (8.5)	0.178

## Sheet: Table 3
Table 3 The correlation analysis of blood pressure and other variables
	SBP	P	DBP	P		SBP	P	DBP	P
Time	At OGTT		At OGTT			When delivery		When delivery
Age (years)	-0.05	0.62	-0.16	0.101		-0.02	0.84	-0.1	0.321
Pre-pregnancy BMI (kg/m2)	0.21	0.039	0.23	0.019		0.21	0.03	0.15	0.14
At performing OGTT
BMI (kg/m2)	0.24	0.025	0.21	0.059		0.35	< 0.001	0.33	0.002
FBG (mmol/L)	0.14	0.172	-0.08	0.437		0.09	0.39	0.16	0.126
1 h BG (mmol/L)	0.03	0.777	-0.07	0.455		0.24	0.01	0.15	0.124
2 h BG (mmol/L)	-0.03	0.761	-0.08	0.41		0.18	0.07	0.11	0.253
HbA1c (%)	0.17	0.083	0.1	0.329		0.25	0.01	0.14	0.178
Area under BG curve	0.07	0.498	-0.05	0.628		0.35	< 0.001	0.23	0.028
HOMA - IR*	0.25	0.026	0.16	0.162		0.07	0.53	0.11	0.314
HOMA - β*	-0.03	0.788	0.17	0.156		-0.19	0.12	-0.18	0.132
CH (mmol/L)	-0.01	0.959	-0.08	0.421		0.04	0.69	0.01	0.896
TG (mmol/L)	0.09	0.366	0.16	0.114		0.18	0.07	0.15	0.126
HDL (mmol/L)	-0.12	0.246	-0.04	0.685		-0.02	0.84	-0.04	0.677
LDL (mmol/L)	0.01	0.947	-0.1	0.336		0.02	0.85	0	0.979
One week before delivery
BMI (kg/m2)	NA	NA	NA	NA		0.39	< 0.001	0.29	0.03
Total GWG (kg)	NA	NA	NA	NA		0.22	0.029	0.12	0.224
The rate of weight gain after intervention (kg week-1)	NA	NA	NA	NA		0.07	0.95	0.036	0.751

## Sheet: Table 4
Table 4 Logistic regression analysis with enter selection for presence/absence GH
		B	OR	95% CI	P		B	OR	95% CI	P
Insulin therapy		1.85	6.33	1.17 - 34.09	0.032		1.89	6.65	1.14 - 38.65	0.035
History of hypertension		3.1	22.4	2.66 -188.96	0.004		4.18	65.13	3.81 - 703.54	0.004
2h BG (mmol/L)		0.63	1.88	1.10 - 3.21	0.02		0.5	1.65	0.91 – 2.99	0.099
Total GWG (kg)
Adequate		reference
Inadequate		-1.24	0.29	0.04 - 2.18	0.228
Excessive		2.07	7.89	1.63 – 38.15	0.01
The rate of weight gain during intervention (kg week-1)
Adequate		NA					reference
Inadequate		NA	NA	NA	NA		0.02	1.02	0.06 – 18.50	0.992
Excessive		NA	NA	NA	NA		2.87	17.56	1.05 – 192.42	0.046
